# Supplementary material
Source: MDPI journal article supplement (https://www.mdpi.com/2071-1050/7/7/8598)
Supplement: s2 [file s2]

## Sheet: Mistra socsust 2015
		Classification of the 99 articles reviewed
		Article	Type of paper			Genetic modification				Plant					Group of impacts addressed					Socioeconomic context	Country
			Review	Bottom-up	Top down	Insect resistant (Bt)	Herbicide tolerant	Other modifications	Not specified/not applicable	Cotton	Maize	Soy bean	Other	Not specified/not applicable	Economic	Distributional	Access and ownership	Wellbeing	Cultural heritage	1) Global North 2) Global South 3) Both 4) Not relevant	country codes in accordance with ISO 3166-1
		Acosta Reveles 2012	0	0	1	0	1	0	0	0	0	1	0	0	1	1	1	1	0	2	MX, AR
		Ali & Abdulai 2010	0	0	1	1	0	0	0	1	0	0	0	0	1	0	0	0	0	2	PK
		Andrée 2011	0	0	1	0	1	0	0	0	0	0	1	0	1	1	1	1	0	1	CA
		Ahsan & Altaf 2009	1	0	0	1	0	0	0	1	0	0	0	0	1	0	1	0	0	2	PK
		Azadi & Ho 2010	1	0	0	0	0	0	1	0	0	0	0	1	1	1	1	1	1	2	0
		Azadi et al. 2011	0	0	1	0	0	0	1	0	0	0	0	1	1	1	1	0	0	2	ET
		Arza et al. 2013	0	1	0	1	1	0	0	1	0	0	0	0	1	1	1	0	0	2	AR
		Bazuin et al. 2011	0	0	1	0	0	0	1	0	0	0	0	1	1	1	1	1	0	2	0
		Bellon & Berthaud 2006	1	0	1	0	0	0	1	0	1	0	0	0	0	0	0	0	1	2	MX
		Bennett et al. 2004	0	1	0	1	0	0	0	1	0	0	0	0	1	1	0	1	0	2	ZA
		Bennett et al. 2006	0	1	1	1	0	0	0	1	0	0	0	0	1	1	0	1	0	2	ZA
		Berman et al. 2013	0	0	1	0	0	0	1	0	0	0	1	0	1	1	0	1	0	3	0
		Bhardwaj 2013	0	0	1	1	1	0	0	1	0	1	0	0	1	1	1	0	0	2	IN, BR, CN
		Bothma et al. 2010	1	0	0	0	0	0	1	0	0	0	0	1	1	0	0	1	0	2	ZA
		Botta et al. 2011	0	1	1	0	0	1	0	0	0	1	0	0	1	1	0	1	0	2	AR
		Brookes & Barfoot 2008	0	0	1	0	0	0	1	0	0	0	0	1	1	0	0	0	0	3	0
		Brookes & Barfoot 2007	0	0	1	0	0	0	1	0	0	0	0	1	1	0	0	0	0	3	0
		Brookes & Barfoot 2009	0	0	1	0	0	0	1	0	0	0	0	1	1	0	0	0	0	3	0
		Buiatti 2005	0	0	1	0	0	0	1	0	0	0	0	1	0	0	1	1	1	4	0
		Carpenter 2013	1	0	1	0	0	0	1	0	0	0	0	1	1	1	0	1	0	3	0
		Chaturvedi et al. 2012	1	0	0	0	0	0	1	0	0	1	1	0	1	1	1	1	1	4	0
		Debyani & Neeta 2012	0	1	0	1	0	0	0	1	0	0	0	0	1	0	0	1	0	2	IN
		Dowd-Uribe 2014	0	0	1	1	0	0	0	1	0	0	0	0	1	1	1	1	0	2	BF
		Ervin et al. 2010	1	0	1	0	0	0	1	0	0	0	0	1	1	1	1	1	0	3	0
		Ervin et al. 2010	0	0	1	0	0	0	1	0	0	0	0	1	1	1	1	0	0	3	0
		Ezezika et al. 2013	0	1	1	1	0	0	0	1	1	0	0	0	1	1	1	0	0	2	0
		Finger et al. 2011	1	0	1	1	0	0	0	1	1	0	0	0	1	0	0	0	0	3	0
		Franceson 2006	0	0	1	0	0	0	1	0	0	0	0	1	1	1	1	1	1	2	0
		Francisco et al. 2012	0	1	1	1	0	0	0	0	0	0	1	0	1	1	0	0	0	2	PH
		Gabol et al. 2012	1	0	0	0	0	0	1	0	0	0	0	1	1	1	1	1	1	2	PK
		Gamanagatti et al. 2012	0	1	0	1	0	0	0	1	0	0	0	0	1	1	0	0	0	2	IN
		Glenna & Jussaume 2010	0	0	1	0	0	0	1	0	0	0	0	1	1	1	1	1	0	4	0
		Glover 2010	1	0	0	1	0	0	0	1	0	0	0	0	1	1	0	1	0	2	0
		Godara et al. 2012	0	1	0	1	0	0	0	1	0	0	0	0	1	0	0	1	0	2	IN
		Gonsalves et al. 2007	1	0	0	0	0	1	0	0	0	0	1	0	1	0	0	0	0	1	US
		Gouse 2012	0	1	0	1	1	0	0	0	1	0	0	0	1	0	0	0	0	2	ZA
		Gouse et al. 2005	0	0	1	1	0	0	0	1	0	0	0	0	1	0	0	0	0	2	ZA
		Gruère & Sengupta 2011	0	0	1	1	0	0	0	1	0	0	0	0	0	0	0	1	0	2	IN
		Hall et al. 2008	0	1	0	0	1	0	0	0	0	1	0	0	0	1	0	0	1	2	BR
		Herdt 2006	1	0	1	1	1	1	0	1	1	1	1	0	1	1	1	1	1	3	0
		Hofs et al. 2006	0	1	0	1	0	0	0	1	0	0	0	0	1	0	0	0	0	2	ZA
		Hoyer Toft 2012	0	0	1	0	0	0	1	0	0	0	0	1	0	1	0	1	0	4	0
		Huang et al. 2008	0	1	0	1	0	0	0	0	0	0	1	0	1	0	0	0	0	2	CN
		Huang et al. 2005	0	1	0	1	0	0	0	0	0	0	1	0	1	0	0	1	0	2	CN
		Ivanic & Martin 2011	0	0	1	0	0	0	1	0	0	0	0	1	1	0	0	0	0	2	0
		James, 2010	0	0	1	0	0	0	1	0	0	0	0	1	1	0	0	1	0	2	0
		Kathage & Qaim 2012	0	1	0	1	0	0	0	1	0	0	0	0	1	0	0	0	0	2	IN
		Kiresur & Manjunath 2011	0	1	0	1	0	0	0	1	0	0	0	0	1	0	0	1	0	2	IN
		Kolady & Lesser 2008	0	1	0	1	0	0	0	0	0	0	1	0	1	0	0	0	0	2	IN
		Krishna & Qaim 2008	0	1	0	1	0	0	0	0	0	0	1	0	1	0	0	1	0	2	IN
		Leguizamon 2014	1	0	0	0	0	0	1	0	0	1	0	0	0	1	0	1	0	2	AR
		Lemaux 2009	1	0	0	0	0	0	1	0	0	0	0	1	1	0	1	1	0	3	0
		Morse & Bennett 2008	0	1	0	1	0	0	0	1	0	0	0	0	1	1	0	0	0	2	ZA
		Morse & Mannion 2009	1	0	0	1	0	0	0	1	0	0	0	0	1	1	0	1	0	2	0
		Mutuc et al. 2013	0	1	0	1	0	0	0	0	1	0	0	0	1	1	0	0	0	2	PH
		Newell & Mackenzie 2004	0	1	1	0	0	0	1	0	0	0	0	1	0	1	1	1	1	2	0
		Otero & Pechlaner 2005	1	0	1	0	0	0	1	0	0	0	0	1	0	1	1	0	0	3	0
		Ozor 2008	0	0	1	0	0	0	1	0	0	0	0	1	1	1	1	1	1	2	0
		Parfitt 2013	0	0	1	0	0	0	1	0	0	0	0	1	1	1	1	0	0	3	AU
		Pechlaner & Otero 2008	0	1	1	1	1	0	0	1	1	1	1	0	0	1	1	0	0	3	US, CA, MX
		Perrin & Fulginiti 2008	0	0	1	0	0	0	1	0	0	0	0	1	0	0	1	0	0	4	0
		Peshin et al. 2007	0	1	0	1	0	0	0	1	0	0	0	0	1	0	0	0	0	2	IN
		Piesse & Thirtle 2008	0	0	1	0	1	0	0	0	1	0	0	0	1	0	0	0	0	2	ZA
		Pillarisetti et al. 2007	0	0	1	0	0	0	1	0	0	0	0	1	1	1	0	1	1	2	0
		Pingali 2012	0	0	1	0	0	0	1	0	0	0	0	1	1	1	0	1	0	2	0
		Popp & Lakner 2013	1	0	0	0	0	0	1	0	1	0	0	0	1	1	0	0	0	2	0
		Prasad 2012	0	0	1	0	0	0	1	0	0	0	0	1	0	0	1	0	1	2	0
		Pray & Naseem 2007	0	0	1	0	0	0	1	0	0	0	0	1	1	1	0	1	0	2	0
		Punia et al. 2011	0	0	1	0	0	0	1	0	0	0	0	1	1	1	0	0	0	2	IN
		Purcell & Perlak 2004	1	0	0	1	0	0	0	1	0	0	0	0	1	0	0	1	0	3	0
		Qaim 2009	1	0	0	1	1	1	0	1	1	1	1	0	1	1	1	1	0	2	0
		Qaim 2010	1	0	0	0	0	0	1	0	0	0	0	1	1	0	0	1	0	2	0
		Qaim & Kouser 2013	0	1	0	1	0	0	0	1	0	0	0	0	1	0	0	1	0	2	IN
		Qaim & Matuschke 2005	1	0	0	1	1	1	0	1	1	1	1	0	1	1	1	1	0	2	0
		Racovita et al. 2014	0	0	1	0	0	0	1	0	0	0	0	1	0	0	0	1	0	4	0
		Ramasundaram et al. 2007	0	1	0	1	0	0	0	1	0	0	0	0	1	0	0	0	0	2	IN
		Raney & Matuschke 2011	1	0	0	1	1	1	0	1	1	1	1	0	1	1	0	1	0	2	0
		Rao & Dev 2009	1	0	1	1	0	0	0	1	0	0	0	0	1	1	1	0	0	2	0
		Regier et al. 2012	0	1	0	0	1	0	0	0	1	0	0	0	1	0	0	0	0	2	ZA
		Richards 2010	0	0	1	0	1	0	0	0	0	1	0	0	1	1	1	1	1	2	AR, BR, PY
		Ronald 2011	1	0	0	1	1	1	0	1	1	1	1	0	1	0	0	1	0	3	0
		Russell 2008	0	1	1	1	1	0	0	1	0	0	0	0	1	0	1	1	0	1	AU
		Salazar & Montenegro 2009	1	0	0	1	1	1	0	1	1	1	1	0	0	0	0	1	0	2	CL
		Sanglestsawai et al. 2014	0	1	0	1	0	0	0	0	1	0	0	0	1	1	0	0	0	2	PH
		Shankar et al. 2008	0	1	0	1	0	0	0	1	0	0	0	0	1	0	0	0	0	2	ZA
		Speiser et al. 2013	1	0	0	1	1	1	0	0	1	0	1	0	1	0	0	0	0	1	CH
		Stone 2004	0	1	1	1	0	0	0	1	0	0	0	0	0	1	1	0	1	2	IN
		Stone 2011	0	1	1	1	0	0	0	1	0	0	0	0	1	1	1	0	1	2	IN
		Subramanian & Quaim 2009	0	1	1	1	0	0	0	1	0	0	0	0	1	1	0	0	0	2	IN
		Subramanian & Qaim 2010	0	1	0	1	0	0	0	1	0	0	0	0	1	1	0	0	0	2	IN
		Thirtle et al. 2005	1	0	1	1	0	0	0	1	0	0	0	0	1	0	0	0	0	2	ZA
		Wale 2012	1	0	1	0	0	0	1	0	0	0	0	1	1	1	1	0	0	2	0
		van Zwanenberg & Arza 2013	0	1	1	1	1	0	0	1	0	0	0	0	0	1	1	0	0	2	AR
		Vitale et al. 2011	1	0	0	1	0	0	0	1	0	0	0	0	1	0	1	0	0	2	BF
		Vitale et al. 2010	0	1	0	1	0	0	0	1	0	0	0	0	1	0	0	0	0	2	BF
		Yorobe & Smale 2012	0	1	0	1	0	0	0	0	1	0	0	0	1	1	0	0	0	2	PH
		Yuan et al. 2011	1	0	1	1	1	1	0	1	1	0	1	0	1	0	0	1	0	2	0
		Yusuf et al. 2010	1	0	0	0	0	0	1	0	0	0	0	0	1	0	1	0	0	2	NG
		Zhao & Shewry 2011	1	0	0	0	0	1	0	0	1	0	1	1	0	0	0	1	0	4	0
